# Supplementary material
Source: Springer Nature journal article supplement (https://www.springermedizin.de/resource/supplementary/12990_2011_387_MOESM8_ESM.pdf/9613164)
Supplement: MOESM8 [file 9613164]

**Table 1**

| <b>Treatment</b>   | <b>Mice</b> | <b>Neurons</b> | <b>Brush</b>        | <b>Press</b>        | <b>Pinch</b>        | <b>Acetone</b>      |
|--------------------|-------------|----------------|---------------------|---------------------|---------------------|---------------------|
|                    |             |                | <b>Spikes (SEM)</b> | <b>Spikes (SEM)</b> | <b>Spikes (SEM)</b> | <b>Spikes (SEM)</b> |
| <b>Naïve</b>       | n = 6       | n = 20         | 24.47 (4.62)        | 25.78 (5.92)        | 46.56 (9.97)        | 13.92 (3.01)        |
| <b>Oxaliplatin</b> | n = 6       | n = 23         | 64.93 (6.27) **     | 70.59 (11.17) **    | 123.38 (14.77) **   | 43.09 (9.16) #      |
